# Robo2 determines subtype-specific axonal projections of trigeminal sensory neurons

Y. Albert Pan<sup>1,‡</sup>, Margaret Choy<sup>1,2</sup>, David A. Prober<sup>1,\*</sup> and Alexander F. Schier<sup>1,3,4,5,‡</sup>

## SUMMARY

How neurons connect to form functional circuits is central to the understanding of the development and function of the nervous system. In the somatosensory system, perception of sensory stimuli to the head requires specific connections between trigeminal sensory neurons and their many target areas in the central nervous system. Different trigeminal subtypes have specialized functions and downstream circuits, but it has remained unclear how subtype-specific axonal projection patterns are formed. Using zebrafish as a model system, we followed the development of two trigeminal sensory neuron subtypes: one that expresses *trpa1b*, a nociceptive channel important for sensing environmental chemicals; and a distinct subtype labeled by an *islet1* reporter (*Isl1SS*). We found that *Trpa1b* and *Isl1SS* neurons have overall similar axon trajectories but different branching morphologies and distributions of presynaptic sites. Compared with *Trpa1b* neurons, *Isl1SS* neurons display reduced branch growth and synaptogenesis at the hindbrain-spinal cord junction. The subtype-specific morphogenesis of *Isl1SS* neurons depends on the guidance receptor Robo2. *robo2* is preferentially expressed in the *Isl1SS* subset and inhibits branch growth and synaptogenesis. In the absence of Robo2, *Isl1SS* afferents acquire many of the characteristics of *Trpa1b* afferents. These results reveal that subtype-specific activity of Robo2 regulates subcircuit morphogenesis in the trigeminal sensory system.

**KEY WORDS:** Nociception, Somatosensory, TRPA1, Targeting, Axon guidance, Synaptogenesis, Zebrafish

## INTRODUCTION

The remarkable diversity and specific connectivity of sensory neurons are crucial for the ability to sense and distinguish environmental stimuli (Kay et al., 2011; Luo and Flanagan, 2007; Marmigere and Ernfor, 2007; Mombaerts et al., 1996). In the somatosensory system, chemical, mechanical and thermal stimuli to the head are sensed by different trigeminal sensory neuron subtypes that have varied morphologies and distinct axonal connections to second-order neurons (Brodal, 2010; Erzurumlu et al., 2010; Todd, 2010). Trigeminal sensory neuron subtypes can be characterized by several molecular criteria, such as the expression of high-affinity neurotrophin receptors (*trkA*, *trkB* and *trkC*; also known as *ntkr1*, *ntkr2* and *ntkr3*, respectively), transcription factors, neuropeptides, ion channels and G protein-coupled receptors (Basbaum et al., 2009; Liu and Ma, 2011; Woolf and Ma, 2007). Examples include transient receptor potential (TRP) ion channels that confer sensitivity to temperature and chemicals (TRPV1 for heat and TRPA1 for noxious chemicals), and P2X class ion channels that detect ATP and modulate pain sensation (Caterina et al., 1997; Chen et al., 1995; Story et al., 2003). These markers are conserved in vertebrates and allow specific labeling of genetically defined sensory subtypes, enabling the study of specific

sensory subcircuits (Caron et al., 2008; Cavanaugh et al., 2011; Dhaka et al., 2008; Kucenas et al., 2006; Takashima et al., 2007; Zylka et al., 2005).

Afferent morphologies of different trigeminal subtypes share several features. Each trigeminal sensory neuron extends a single axon shaft along the lateral white matter of the hindbrain and spinal cord. Numerous medially projecting branches are later formed and innervate a series of target nuclei along the anteroposterior axis of the hindbrain and spinal cord (Erzurumlu et al., 2006; Jacquin et al., 1986). The anteriorly located principal sensory nucleus (PrV) is the main relay station for mechanical stimuli, whereas the posteriorly located spinal trigeminal nucleus (SpV) and cervical spinal dorsal horn are important for sensing noxious and thermal stimuli (Brodal, 2010; Noma et al., 2008). Functional specificity is determined by the spatial pattern of branch termination, which differs greatly between subtypes (Erzurumlu et al., 2010; Marmigere and Ernfor, 2007). For example, axon terminals that express TRPA1 and P2x3 (also known as P2rx3) are sparse in PrV and dense in SpV (Kim et al., 2008; Kim et al., 2010). Despite the importance of accurate subcircuit formation for the proper transmission of sensory information, it has remained unclear how different trigeminal sensory neuron subtypes select specific targets along the anterior-posterior axis.

One possible mechanism for selective anterior-posterior targeting is through regulation of branch growth and synaptogenesis by Robo/Slit signaling. Robo proteins are cell surface receptors that bind to the secreted ligand Slit. Signaling via Robo receptor activation plays diverse roles in shaping the developing nervous system, including axon targeting, synaptogenesis and cell migration (Campbell et al., 2007; Cho et al., 2007; Cho et al., 2011; Dickson and Gilestro, 2006; Xiao et al., 2011). Robo/Slit signaling can exert either positive or negative influences on axonal growth and branching, in some cases having both effects on the same cell (Ma and Tessier-Lavigne, 2007; Ypsilanti et al., 2010). Previous reports, however, are conflicting regarding how Robo/Slit signaling affects

<sup>1</sup>Department of Molecular and Cellular Biology, Harvard University, 16 Divinity Avenue, Cambridge, MA 02138, USA. <sup>2</sup>Developmental Genetics Program, New York University School of Medicine, New York, NY 10016, USA. <sup>3</sup>Harvard Stem Cell Institute, Harvard University, Cambridge, MA 02138, USA. <sup>4</sup>Broad Institute of MIT and Harvard, Cambridge, MA 02142, USA. <sup>5</sup>Center for Brain Science, Harvard University, Cambridge, MA 02138, USA.

\*Present address: Division of Biology, California Institute of Technology, Pasadena, CA 91125, USA

<sup>‡</sup>Authors for correspondence (yapan@mcb.harvard.edu; schier@fas.harvard.edu)

somatosensory primary afferents. In rats, exogenously supplied Slit2 can promote growth and branching of trigeminal afferents (Ozdinler and Erzurumlu, 2002). By contrast, genetic studies in zebrafish and mice suggest that Robo activation acts to repel trigeminal afferent branches (Ma and Tessier-Lavigne, 2007; Yeo et al., 2004). For example, Yeo et al. (Yeo et al., 2004) found that overexpression of Slit is sufficient to repel trigeminal afferents in zebrafish embryos, but it has been unclear whether Slit/Robo signaling is necessary for normal trigeminal morphogenesis. Furthermore, it is unclear whether Robo signaling plays a role in regulating the formation of subtype-specific projections.

To determine how subtype-specific axonal projections are formed, we used zebrafish (*Danio rerio*) trigeminal sensory neurons as a model system. Zebrafish larvae are small, transparent and contain only ~60 trigeminal sensory neurons per ganglion, making it possible to observe axonal morphogenesis in vivo at single-cell resolution (Caron et al., 2008; Knaut et al., 2005; Sagasti et al., 2005). Using this system, we defined two trigeminal sensory neuron subtypes with distinct afferent morphologies and projection patterns and discovered that Robo2 regulates the development of subtype-specific afferent projections by inhibiting branch growth and synaptogenesis. These results reveal that Robo2 function is essential for subcircuit morphogenesis in the somatosensory system.

## MATERIALS AND METHODS

### Zebrafish strains

Embryos and larvae were raised at 28.5°C in water containing 0.1% Methylene Blue hydrate (Sigma, St Louis, MO, USA). At 24 hours post-fertilization, embryos were transferred to water containing 0.003% 1-phenyl-2-thiourea (PTU; Sigma) to prevent pigment formation. Developmental stages are as described by Kimmel et al. (Kimmel et al., 1995). *robo2* (*astray*) homozygous mutant larvae (*astray*<sup>tr272z/iii272z</sup>) were obtained from the Chien laboratory (University of Utah, Salt Lake City, UT, USA) (Fricke et al., 2001).

### Generation of transgenic fish lines

The *Isl1SS:Kaede* reporter construct was generated by replacing the coding sequence of eGFP from the *Tg(sensory:gfp)* construct (Sagasti et al., 2005) with the coding sequence of *Kaede* (Ando et al., 2002). *Isl1SS:Kaede* germline transgenic fish were generated by co-injecting plasmid DNA and *I-SceI* meganuclease into one-cell stage embryos (Thermes et al., 2002). One stable transgenic line was recovered. *Kaede* expression is variegated within each batch of embryos, which is likely to be due to epigenetic silencing of UAS elements (Goll et al., 2009). *Isl1SS:Kaede* larvae with high *Kaede* expression levels were used for analysis.

The *Trpa1b:GFP* reporter construct was generated by ET recombination of a bacterial artificial chromosome (BAC) (Zhang et al., 1998). BAC clone CHORI211-236I20 contains 115 kb upstream of the zebrafish *Trpa1b* translation start site followed by a 52 kb region that encodes the extracellular domain of *Trpa1b*. The eGFP gene and the kanamycin resistance gene were inserted at the *trpa1b* translation start site, replacing the first two *trpa1b* exons. The recombinant clone was validated by PCR, sequencing and transient expression assays. To generate a stable transgenic line, linearized BAC DNA was injected into one-cell stage zebrafish embryos followed by screening of adults for fluorescent progeny. One stable transgenic line was recovered. We and others (C. B. Chien, personal communication) have been unable to generate transgenic lines that allow the expression of full-length Robo2 under UAS control.

### Subtype-specific single trigeminal sensory neuron labeling

To label single *Isl1SS:Kaede* trigeminal sensory neurons, 1 nl of 10 pg/nl *Isl1SS:Kaede* plasmid DNA was injected into the yolk of one-cell stage embryos. Injected embryos were kept in the dark and screened at 2–3 days post-fertilization (dpf) for labeling of single trigeminal sensory neurons. Trigeminal sensory neurons were then photoconverted with a 405 nm confocal laser, as previously described (Caron et al., 2008). To label single

*Trpa1b:GFP* trigeminal sensory neurons, 0.5 nl of 45 pg/nl *Trpa1b:GFP* BAC DNA was injected into a single cell of a four- to eight-cell stage embryo. Injected embryos were screened at 2–3 dpf. To label presynaptic puncta, *Isl1SS:Gal4* was co-injected with the UAS-Syp-GFP-DSR plasmid, obtained from the Meyer laboratory (King's College London, London, UK) (Meyer and Smith, 2006).

### Image acquisition and processing

All images were acquired using the FV1000 laser-scanning confocal imaging system (Olympus, Tokyo, Japan) on an upright microscope with a 20× XLUMPlanFI water-immersion objective. Larvae were anesthetized with 0.01% tricaine methanesulfonate (MS-222, Sigma) and transferred to a glass-bottomed Petri dish (P35G-0-14-C, MatTek). Molten 1.5% low-melt agarose (UltraPure LMP agarose, Invitrogen), kept on dry heat at 40°C, was then added to the dish. Fish were arranged so that the surface to be imaged was facing the glass bottom. The dish was inverted for imaging (glass side up). For multi-time point experiments, larvae were released from the agarose after imaging with fine forceps and returned to a 28.5°C incubator for recovery.

Images were processed using FluoView (Olympus), ImageJ (NIH, <http://rsbweb.nih.gov/ij/>) and Photoshop (Adobe Systems, San Jose, CA, USA) software. Varicosities were counted manually. Branch length was measured using the NeuronJ plug-in in ImageJ. Hindbrain segments were delineated using the following criteria: segment 1 was defined as areas anterior to the anterior (utricular) otolith (AO); segments 2–4 were located between the AO and the posterior third of the posterior (sacculus) otolith (PO); segments 5–7 were located between the posterior third of the PO and the posterior boundary of the first somite; segments 8–9, 10–11, 12–13 and 14–15 corresponded to the anterior and posterior halves of somites 2, 3, 4 and 5, respectively (Fig. 4A). To correlate segments with rhombomeres, hindbrain cranial motor nuclei were labeled using the *Isl1:GFP* transgenic line (Higashijima et al., 2000). Using cranial motor nuclei as markers, the positions of rhombomeres 2–8 were identified and mapped onto the segments as defined above (Ma et al., 2009; Mapp et al., 2011) (Fig. 4A, supplementary material Fig. S1). Varicosities were assigned to segments where they were physically located, whereas branch number and branch length were assigned to segments where branches originated.

### Statistical analysis

One-way analysis of variance (ANOVA) with Newman-Keuls post test was used to compare total varicosity number, branch number and branch length between different genotypes and sensory neuron subtypes. Two-way ANOVA with Bonferroni post test was used to compare the morphological features of different genotypes or sensory neuron subtypes at a given anterior-posterior segment or time point. Statistical tests and *P*-values were calculated using Prism statistical software (GraphPad, La Jolla, CA, USA).

### Fluorescent in situ hybridization and immunohistochemistry

*trpv1*, *trpa1b* and *p2x3b* (*p2rx3b* – Zebrafish Information Network) DIG-labeled antisense RNA probes were synthesized as previously described (Caron et al., 2008). *trkA*, *trkC1* and *trkC2* (*nrk1*, *nrk3a* and *nrk3b*, respectively – Zebrafish Information Network) probes were generated by 5'RACE (SMART RACE cDNA Amplification Kit, Clontech, Mountain View, CA, USA) using 3' primers based on Ensembl exon predictions. The *cgrp* (*calca* – Zebrafish Information Network) probe was generated by RT-PCR with Superscript II reverse transcriptase (Invitrogen) using primers based on Ensembl exon predictions. Sequences are available from GenBank (*trkA*, JN837101; *trkC1*, JN837102; *trkC2*, JN837103; *cgrp*, JN837104). *robo2* and Slit gene probes were obtained from the Chien laboratory (Hutson and Chien, 2002; Hutson et al., 2003; Lee et al., 2001).

Fluorescent in situ hybridization was performed using protocols described previously (Schoenebeck et al., 2007). In brief, embryos were hybridized with DIG-labeled RNA probes overnight at 68°C followed by stringent washes. Samples were incubated with anti-DIG POD-conjugated Fab fragments (Roche, 1:400) and mixed with Cy3-labeled tyramide (PerkinElmer, 1:25). GFP- or *Kaede*-labeled neurons were identified by incubation with rabbit anti-GFP or rabbit anti-*Kaede* antibody, respectively (MBL International, 1:1000). Trigeminal sensory neurons were identified with anti-HuCD (Elavl3/4) antibody (Invitrogen, 1:1000). Fluorescent

secondary antibodies coupled to Alexa dyes were used to detect primary antibodies (Invitrogen, 1:500). To distinguish GFP and Kaede in *Trpa1b:GFP;Isl1SS:Kaede* double transgenics, GFP was stained with a mouse anti-GFP antibody (Roche, 1:300) coupled to Alexa 647 (near infrared), whereas Kaede was stained with rabbit anti-Kaede coupled to Alexa 546 (red).

## RESULTS

### Subtype-specific gene expression of trigeminal sensory neurons

To explore how sensory neuron subtypes form distinct axonal projections, we aimed to identify genetically defined trigeminal sensory neuron subpopulations in larval zebrafish. We had previously found that *Trpa1b*, the zebrafish homolog of the mammalian TRPA1 channel, is expressed in a subset of trigeminal sensory neurons and is required for sensitivity to several environmental and endogenous chemical irritants (Caron et al., 2008; Prober et al., 2008). To label this subpopulation of nociceptive neurons, we generated a *Trpa1b:GFP* BAC transgenic line (Fig. 1A-C). GFP was observed in trigeminal sensory neurons and Rohon Beard sensory neurons (the spinal cord equivalents of the trigeminal sensory neurons), similar to endogenous *trpa1b* expression (Prober et al., 2008). We also observed non-specific GFP expression in olfactory neurons, the retina and the tectum. To test whether GFP expression within the trigeminal ganglion is specific, we performed *trpa1b* in situ hybridization in *Trpa1b:GFP* transgenic larvae and found that GFP accurately marked trigeminal sensory neurons that expressed *trpa1b* (supplementary material Fig. S2). Consistent with *Trpa1b* being a subtype-specific marker, GFP expression was seen in a small subset of trigeminal sensory neurons (10.52±0.51 cells out of 60 neurons at 2 dpf).

To identify an additional trigeminal sensory neuron subtype, we generated a second reporter line, *Isl1SS:Kaede*. This reporter line uses zebrafish *islet1* enhancer elements to drive gene expression in somatosensory neurons (Fig. 1A-C) (Higashijima et al., 2000; Sagasti et al., 2005). Kaede expression was seen in a subset of trigeminal sensory neurons (11.53±0.65 cells/ganglion) that were largely distinct from *Trpa1b:GFP*-expressing neurons (12% overlap; 1.8±0.4 double-positive neurons/ganglion;  $n=238$  *Trpa1b:GFP*<sup>+</sup> neurons; Fig. 1C,D). Additionally, neither subpopulation overlapped with the larger *trkA* (nerve growth factor receptor)-expressing population (17.38±1.66 cells/ganglion) (Knaut et al., 2005; Liu and Ma, 2011; Martin et al., 1995) (Fig. 1D, supplementary material Fig. S3). These results indicate that *Trpa1b* and *Isl1SS* label specific trigeminal sensory neuron subpopulations.

To further examine whether *Trpa1b* and *Isl1SS* subsets are distinct subtypes, we tested a panel of sensory neuron subtype markers by whole-mount in situ hybridization and antibody staining against GFP (in *Trpa1b:GFP*) or Kaede (in *Isl1SS:Kaede*) (Fig. 1E, supplementary material Fig. S3). Trigeminal sensory neurons were identified based on their location, morphology and expression of the pan-neuronal marker HuC/D. *trkC1*, which encodes a receptor for Neurotrophin 3 (Martin et al., 1998; Williams et al., 2000), was preferentially expressed in the *Trpa1b* subset (94% of *Trpa1b*<sup>+</sup> neurons) compared with *Isl1SS* (24% of *Isl1SS*<sup>+</sup> neurons). A similar trend was observed with the *trkC* paralog *trkC2*. Several markers of nociceptive neurons were also differentially expressed: *p2x3b* (ATP receptor and marker for non-peptidergic nociceptors) was preferentially expressed in *Trpa1b* neurons (100%, versus 24% in *Isl1SS*), whereas *calcitonin gene-related peptide (cgrp)*, a marker for peptidergic nociceptors) was preferentially expressed

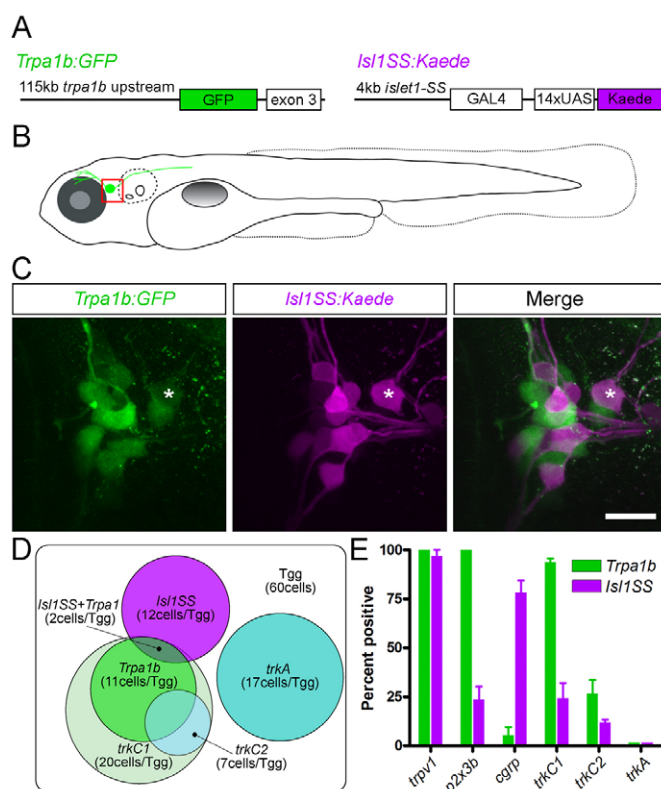

**Fig. 1. Trigeminal subtype reporter lines and marker gene expression.**

(A) Transgenic constructs used to generate *Trpa1b:GFP* (left) and *Isl1SS:Kaede* (right) transgenic lines. (B) Illustration of a trigeminal sensory neuron (green cell abutting the eye) in a fish at 5 dpf. The trigeminal ganglion (boxed area) is shown in C. (C) Trigeminal ganglion in a 5 dpf *Trpa1b:GFP;Isl1SS:Kaede* double-transgenic larva. GFP-positive (green) and Kaede-positive (magenta) trigeminal sensory neurons are largely distinct. Asterisk indicates a double-labeled cell. (D) Summary Venn diagram of distinct trigeminal subtypes defined by neurotrophin receptors (*trkA* and *trkC1*) and transgenic reporters. The box represents the entire trigeminal ganglion (Tgg) and circles indicate populations of trigeminal sensory neurons labeled by the markers indicated. (E) Quantification of marker gene expression (%) in each subset at 2 dpf. Error bars indicate s.e.m. Three to ten ganglia were counted for each marker. Scale bar: 20  $\mu$ m.

in *Isl1SS* neurons (78%, versus 6% in *Trpa1b* neurons). These results establish that *Trpa1b* and *Isl1SS* neurons belong to different subtypes of trigeminal sensory neurons.

### Subtype-specific morphologies of trigeminal sensory neurons

In addition to specific gene expression profiles, neuronal cell types are defined by morphological properties such as the position and branching pattern of neurites. These features also provide clues as to the connectivity patterns of the overall neural circuit (Masland, 2004). To test whether *Trpa1b* and *Isl1SS* neurons are morphologically distinct, we investigated the branching pattern and target specificity of their afferent axons by in vivo imaging. To obtain sparse labeling and allow unambiguous tracing and measurement of axon collaterals, we used DNA microinjection to generate mosaic transgenic fish with only one trigeminal sensory neuron labeled per ganglion (Fig. 2A-C). We found that *Trpa1b* and *Isl1SS* axons were distinct and stereotyped. The main axon



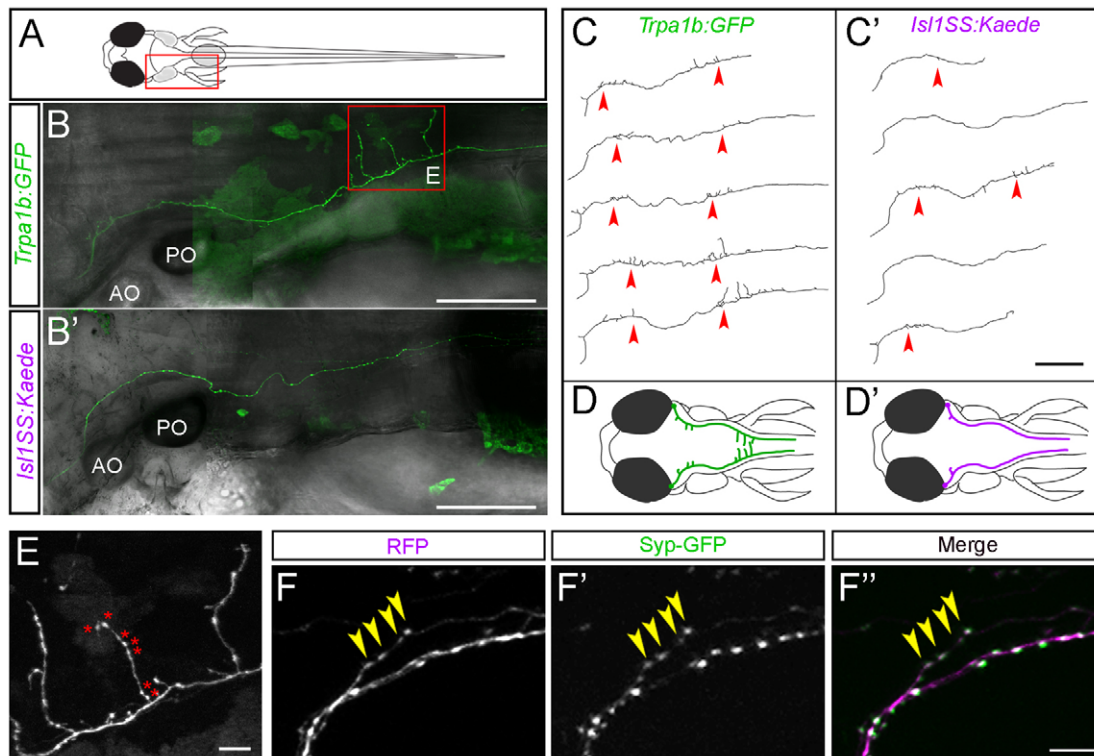

**Fig. 2. Mosaic single-cell labeling of trigeminal sensory neuron subtypes.** (A) Schematic of a 5-dpf larval zebrafish, viewed from the dorsal side. The boxed area corresponds to the imaged areas shown in B,B'. (B,B') In vivo imaging of single trigeminal sensory neurons. Fluorescent image is shown in green and bright-field image is superimposed in gray. Extensive branch growth is seen in the *Trpa1b* subset (B), but not the *Isl1SS* subset (B'). Boxed area corresponds to imaged area shown in E. (C,C') Axon traces of multiple trigeminal sensory neurons are shown for both subtypes. Red arrowheads point to branches that form along the main axon tract. (D,D') Illustrations of trigeminal afferents from *Trpa1b* (D) and *Isl1SS* (D') subtypes. (E) High-magnification image of boxed area in B. *Trpa1b* axon extends branches and forms numerous varicosities (asterisks). (F-F'') Trigeminal axon labeled with cytoplasmic RFP (magenta, F) and Synaptophysin-GFP (Syp-GFP, green, F'), a fluorescent label for synaptic vesicles (with merge in F''). The presence of varicosities reliably predicts the presence of Syp-GFP puncta (yellow arrowheads). AO, anterior otolith; PO, posterior otolith. Scale bars: 100  $\mu$ m in B-C'; 10  $\mu$ m in E-F''.

shaft follows a similar trajectory in both subtypes. However, compared with *Isl1SS* neurons, *Trpa1b* axons had more branches and increased total branch length (Fig. 2D, Fig. 3A,B). *Trpa1b* axons also tended to extend further down the spinal cord than *Isl1SS* axons. In both subtypes, numerous varicosities were seen along the main axon shaft and on axon collaterals (Fig. 2E). Axonal varicosities, as seen by cytoplasmic fluorescent protein labeling, have previously been found to represent presynaptic puncta in many different zebrafish neuronal cell types (Appelbaum et al., 2010; Campbell et al., 2007; Meyer and Smith, 2006). To test whether this is also the case for trigeminal sensory neuron afferents, we co-expressed a red fluorescent protein (RFP) and Synaptophysin-GFP, a marker of presynaptic puncta, using the *Isl1SS* promoter (Meyer and Smith, 2006). We found that varicosities and GFP puncta were colocalized (Fig. 2F), and the number of varicosities and puncta were significantly correlated ( $R^2=0.74$ ,  $P<0.0001$ ; see supplementary material Fig. S4). Therefore, we used varicosities as a reporter for presynaptic puncta. Comparison of the two trigeminal sensory neuron subtypes revealed that *Trpa1b* axons had significantly more varicosities than *Isl1SS* axons ( $83.54\pm3.04$  versus  $55.84\pm3.36$ ,  $P<0.001$ ; Fig. 3C). Together, these results indicate that genetically defined trigeminal sensory neuron subtypes are morphologically distinct, both in branch morphology and the number of presynaptic puncta.

### Subtype-specific projection patterns of trigeminal sensory neurons

The distinct morphologies of *Trpa1b* and *Isl1SS* neurons raised the possibility that these trigeminal subtypes have distinct projection patterns (Masland, 2004). To map the projections of individual afferents, we used mosaic transgenic labeling with combined fluorescent and bright-field imaging. The bright-field images, which show anatomical landmarks such as otoliths and somites, were used to delineate 15 anterior-posterior segments (Fig. 2A,B, Fig. 4A). These segments were reproducible between individual fish and correlated with rhombomeres 2-8 and anterior regions of the spinal cord (see Materials and methods). Using this anatomical map, the number of branches, the branch length and the number of presynaptic puncta (varicosities) of individual trigeminal sensory neurons were measured and compared between *Trpa1b* and *Isl1SS* neurons.

The number of varicosities revealed subtype-specific patterns of innervation. *Trpa1b* afferents showed two prominent peaks of high varicosity number, one in segments 3-4 and the other in segments 9-11 (Fig. 4B). By contrast, varicosities in the *Isl1SS* afferents showed a broader distribution, with only a minor peak in segment 5. The posterior *Trpa1b* peak corresponded to the areas flanking the hindbrain-spinal cord junction, which is an important processing and relay area for trigeminal pain in mammals

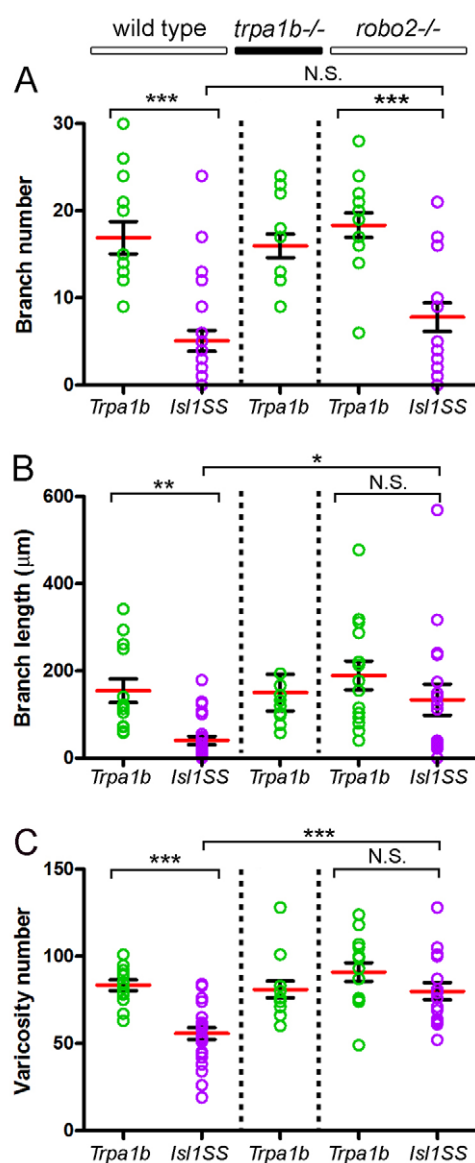

**Fig. 3. Comparison of trigeminal sensory neuron subtype morphologies.** Total branch number (A), branch length (B) and varicosity number (C) compared between subtypes and genotypes. Red bar and black bracket are mean and s.e., respectively. Colored circles are values for individual trigeminal sensory neurons. Sample sizes are: 13, *Trpa1b* in wild type; 25, *Isl1SS* in wild type; 13, *Trpa1b* in *trpa1b*<sup>-/-</sup>; 14, *Trpa1b* in *robo2*<sup>-/-</sup>; 17, *Isl1SS* in *robo2*<sup>-/-</sup>. \*,  $P < 0.05$ ; \*\*,  $P < 0.01$ ; \*\*\*,  $P < 0.001$ ; N.S., no significant difference.

(Goadsby and Hoskin, 1997; Nash et al., 2009; Noma et al., 2008). *Trpa1b* innervation in this region is consistent with its nociceptive function and suggests that the hindbrain-spinal cord junction might also be part of the nociceptive circuitry in zebrafish.

The distribution of branches also differed greatly between *Trpa1b* and *Isl1SS* (Fig. 4C,D). *Trpa1b* afferents formed shorter branches in the anterior segments and longer branches in the posterior segments. Approximately one-quarter (3/13) of *Trpa1b* trigeminal sensory neurons had posterior branches that reached the contralateral side. These contralaterally projecting branches are also seen in the posterior hindbrain of mammalian species and appear to be a feature of nociceptive fibers (Clarke and Bowsher, 1962;

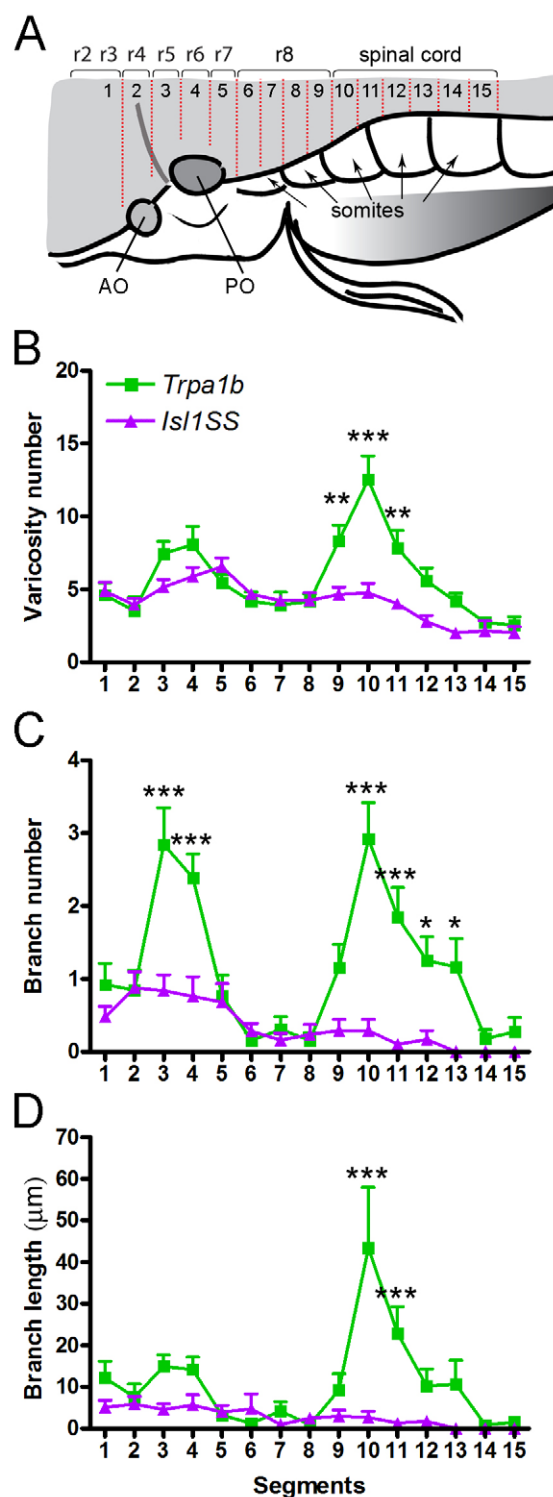

**Fig. 4. Mapping subtype-specific axonal projections.** (A) Branches and varicosities are mapped to defined segments in the zebrafish hindbrain and spinal cord along the anterior-posterior axis. Segments align with positions of rhombomeres (r1-r8) and somites. (B-D) Distribution of varicosity number (B), branch number (C) and branch length (D) along segments 1-15. Similar trends are observed for a given subtype in all three parameters: *Trpa1b* neurons form a minor peak at segments 3-4 and a major peak at segments 9-11, whereas *Isl1SS* neurons do not form any pronounced peaks. Error bars indicate s.e.m. \*,  $P < 0.05$ ; \*\*,  $P < 0.01$ ; \*\*\*,  $P < 0.001$ . AO, anterior otolith; PO, posterior otolith.

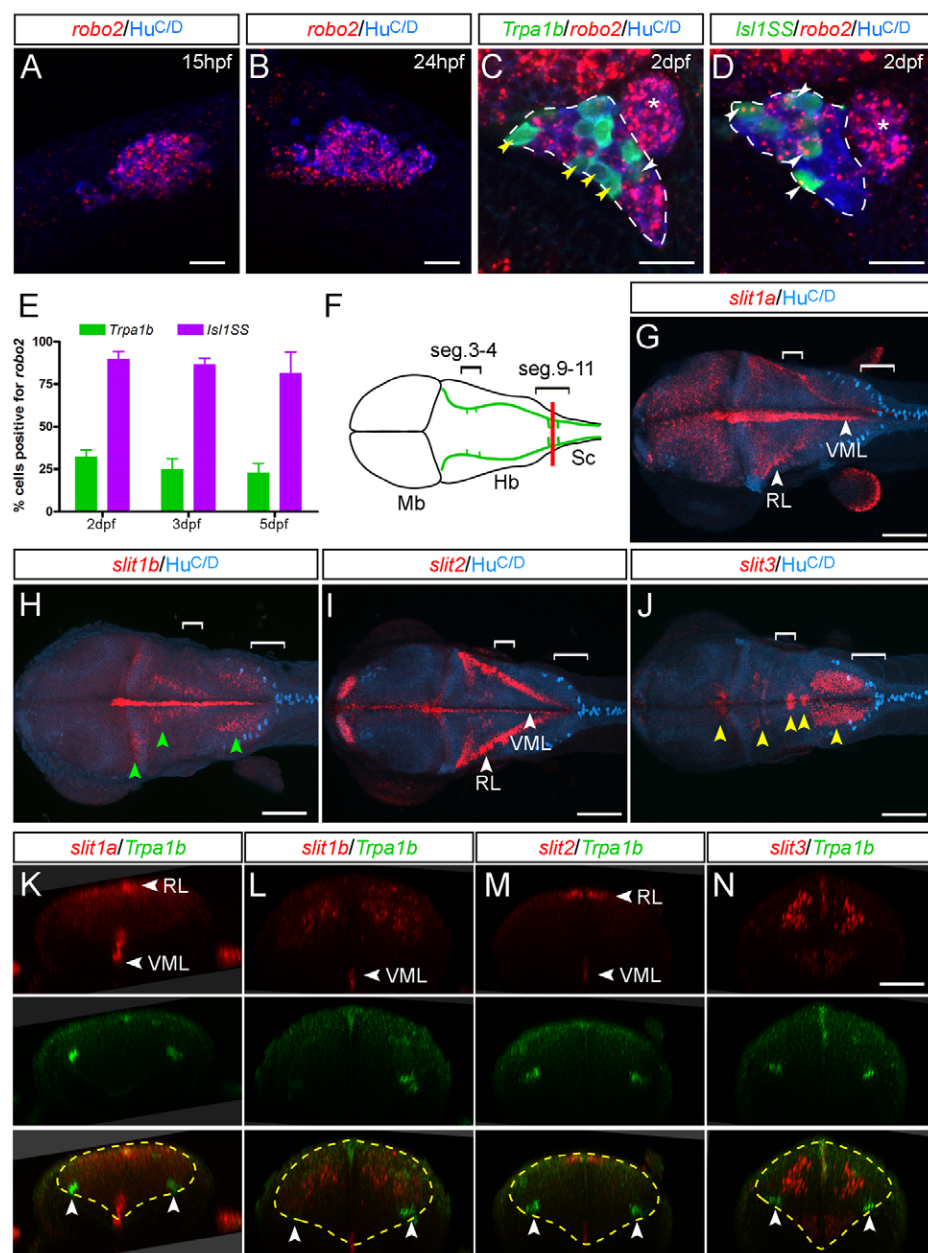

**Fig. 5. Expression of *robo2* and *Slit* genes.** (A,B) Trigeminal ganglion (cluster of blue cells, HuC/D positive) expresses *robo2* (red speckles) in most cells at early stages. (C,D) Starting at 2 dpf, *robo2* becomes differentially expressed in *Trpa1b* versus *Isl1SS* subtypes. The trigeminal ganglion is outlined (dashed lines); the anterior lateral line ganglion is located just posterior to it (asterisk) and is not labeled by either reporter line. (C) In the *Trpa1b* reporter line, most labeled trigeminal neurons (green cells) are negative for *robo2* (yellow arrowheads), with a small proportion that are positive (white arrowhead). (D) In the *Isl1SS* reporter line, most labeled trigeminal neurons are positive for *robo2* (white arrowheads). (E) Quantification of *robo2* expression in the two subtypes at different developmental stages. *robo2* expression is consistently higher in the *Isl1SS* subtype from 2–5 dpf. Error bars indicate s.e.m. (F) Diagram of a 3 dpf zebrafish brain viewed from the dorsal side, corresponding to images shown in G–J. Green lines show the trajectory of the trigeminal afferent track. Brackets indicate segments 3–4 and 9–11. (G–J) Whole-mount in situ hybridization for *Slit* genes co-stained for a neuronal marker (HuC/D). Images are maximal projections of confocal z-stacks. (G,I) *slit1a* and *slit2* are strongly expressed in the ventral midline (VML) and rhombic lip (RL). (H) *slit1b* is expressed in the ventral midline as well as in several distinct nuclei in the hindbrain (green arrowheads). (J) *slit3* is expressed in the cranial motor nuclei (yellow arrowheads). (K–N) Optical transverse sections at the hindbrain–spinal cord boundary (red line in F) of 3-dpf *Trpa1b*:GFP larvae stained for *Slit* genes (red) and *Trpa1b*:GFP (green). *slit1a* is also diffusely expressed in the caudal hindbrain (K). Yellow dashed lines mark the outlines of the hindbrain and arrowheads indicate trigeminal axons. Mb, midbrain; Hb, hindbrain; SC, spinal cord. Scale bars: 20  $\mu$ m in A–D; 100  $\mu$ m in G–J; 50  $\mu$ m in K–N.

Sugimoto et al., 1997a; Sugimoto et al., 1997b). By contrast, *Isl1SS* afferents had only a few short branches in the anterior segments and did not have contralaterally projecting afferents (0/24). These results indicate that *Trpa1b* and *Isl1SS* subpopulations have distinct and stereotypic axonal projections and branch growth patterns.

### Expression of *robo2* and *Slit* genes marks trigeminal sensory neurons and afferent target fields

What are the molecular mechanisms that establish subtype-specific afferent projections? The differential expression of *trpa1b* itself does not appear to be involved because *Trpa1b* neurons in *trpa1b* mutants had normal axonal morphology (Fig. 3). We hypothesized that there might be subtype-specific growth-promoting or inhibitory cues that regulate this process and searched for signaling molecules that were differentially expressed in the two trigeminal subtypes. The axon guidance receptor Robo2 is expressed in the

rodent and zebrafish trigeminal ganglion, but it has been unclear whether it is expressed in all or a subset of sensory neurons and whether it exerts positive or negative effects on axon morphogenesis (Ma and Tessier-Lavigne, 2007; Ozdinler and Erzurumlu, 2002; Yeo et al., 2004). We therefore examined the expression of *robo2* in more detail by fluorescent in situ hybridization. We found that *robo2* was dynamically expressed in trigeminal sensory neurons during development. After initially broad expression (Fig. 5A,B), *robo2* expression became restricted to a subset of trigeminal sensory neurons (Fig. 5C–E). Strikingly, more than 80% of *Isl1SS* neurons and less than 30% of *Trpa1b* neurons expressed *robo2* at 2–5 dpf. These results raised the possibility that Robo2 expression might account for some of the differences in the morphology of *Isl1SS* and *Trpa1b* afferents.

To determine where Robo signaling might be activated, we examined the expression of Slits, the secreted ligands for Robo2. In the hindbrain, all four zebrafish *Slit* genes were expressed



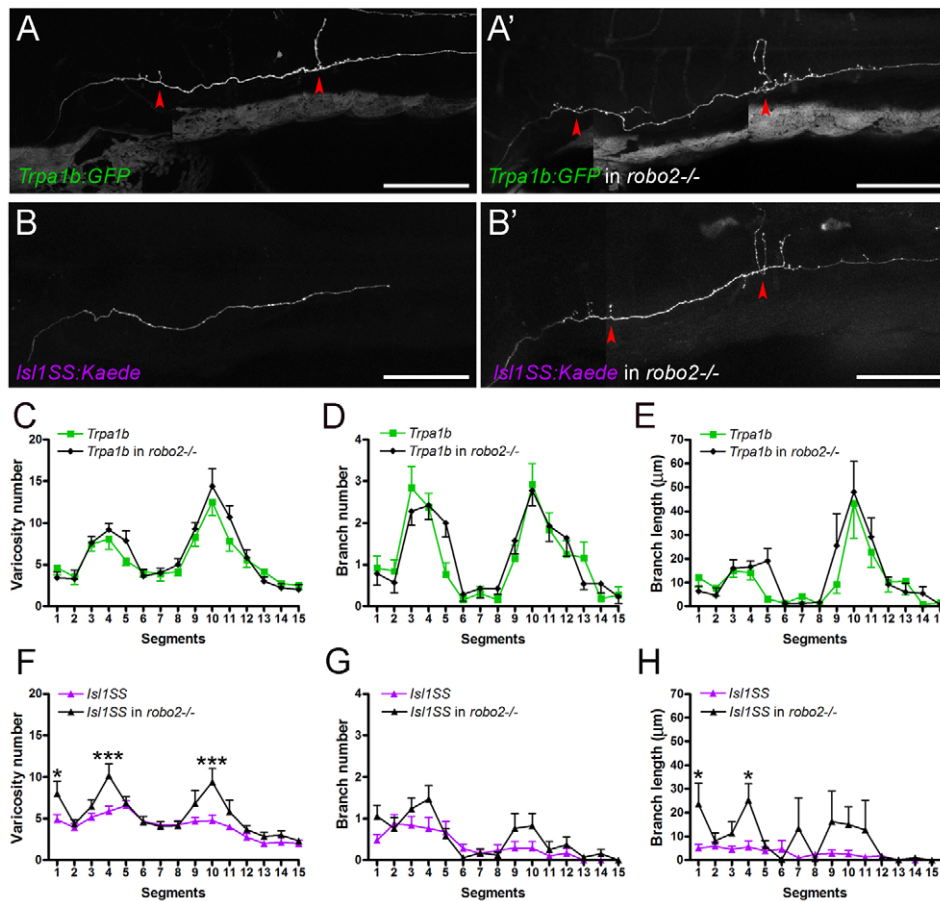

**Fig. 6. Robo2 regulates subtype-specific projection patterns.** (A-B') Trigeminal axonal morphology in wild-type and *robo2*<sup>-/-</sup> zebrafish. Red arrowheads point to branches. *Trpa1b* axonal morphology in *robo2*<sup>-/-</sup> is indistinguishable from that of wild type (A,A'). By contrast, there is a noticeable increase in branch length and varicosity number in the *Isl1SS* subtype in *robo2*<sup>-/-</sup> (B,B'). (C-E) Comparison of *Trpa1b* morphology in wild type (green) versus *robo2*<sup>-/-</sup> (black). No differences were seen in varicosity number (C), branch number (D) or branch length (E). (F-H) Comparison of *Isl1SS* morphology in wild type (magenta) versus *robo2*<sup>-/-</sup> (black). Significant differences were seen in varicosity number (F) and branch length (H), but not branch number (G). Error bars indicate s.e.m. \*, *P*<0.05; \*\*\*, *P*<0.001. Scale bars: 100 μm.

(Fig. 5F-N). *slit1a* and *slit2* were highly expressed in the ventral midline and the rhombic lip, relatively distant from the trigeminal target field. By contrast, *slit1b* and *slit3* were expressed in discrete domains along the anterior-posterior axis, immediately dorsal-medial to the trigeminal afferent track. Slit expression partly overlapped with the anterior and posterior *Trpa1b* peaks, but expression of individual Slit genes did not define its boundaries (Fig. 5F-J, brackets). These results reveal that *robo2* expression is enriched in *Isl1SS* neurons and that multiple Slit genes are expressed in the vicinity of the trigeminal sensory neuron afferents.

### ***robo2* regulates subtype-specific projection patterns**

Robo2 enrichment in *Isl1SS* neurons suggests that Robo/Slit signaling might regulate the afferent projection pattern in the *Isl1SS* subtype. To test this, we examined the axonal morphology of *Trpa1b* and *Isl1SS* subtypes in *robo2* (*astray*) loss-of-function mutants (Fricke et al., 2001; Hutson and Chien, 2002). Strikingly, *Isl1SS* afferents were partially transformed to *Trpa1b*-like morphology in *robo2* mutants (Fig. 6A,B). In either subtype, there were no changes in branch number in *robo2*<sup>-/-</sup> relative to wild-type controls (Fig. 3A). However, *Isl1SS* sensory axons had significantly increased branch length and varicosity number in *robo2* mutants (Fig. 3B,C). By contrast, *Trpa1b* neurons displayed no differences between mutants and controls. Notably, the subtype-specific differences in branch length and varicosity number between *Isl1SS* and *Trpa1b* axons were abolished in *robo2*<sup>-/-</sup> larvae. These results suggest that *robo2* acts to regulate subtype-specific branch length and presynaptic differentiation with no effect on branch formation.

To test whether Robo2 also determines the localization of varicosities and branches, we examined their anterior-posterior distribution in *robo2* mutants (Fig. 6). The projection patterns for *Trpa1b* neurons were not affected by loss of Robo2 (Fig. 6C). By contrast, *Isl1SS* neurons had increased varicosities in both anterior (segments 3-4) and posterior (segments 9-11) segments in *robo2* mutants, compared with wild-type controls (Fig. 6F). Thus, *Isl1SS* and *Trpa1b* neurons acquired very similar varicosity distributions. Segment-specific changes were also observed for branch number and branch length, but the changes were less pronounced than those observed for varicosities (Fig. 6D,E,G,H). These results indicate that signaling through *robo2* is a key regulator of the region-specific morphology of a subset of trigeminal sensory neurons.

### **Morphogenesis of subtype-specific branch growth and synaptogenesis**

Subtype-specific differences in branch morphology and synapse number may arise from (1) selective addition and growth in *Trpa1b* afferents or (2) equal growth in both subpopulations followed by selective pruning in *Isl1SS* afferents. To distinguish between these possibilities, we analyzed the dynamics of branch growth and varicosity formation at the hindbrain-spinal cord junction by *in vivo* imaging (segments 9-11, Fig. 7A). At 2 dpf, *Trpa1b* and *Isl1SS* neurons showed very similar morphology, with short branches and comparable varicosity number (Fig. 7B-E). Morphological changes arose between 2 and 3 dpf, when *Trpa1b* neurons increased branch number, branch length and varicosity number. Branch growth slowed down over the next few days (4-5 dpf), while varicosity number steadily increased. *Isl1SS* neurons, by contrast, had only modest increases in varicosity number and no changes in branch number and

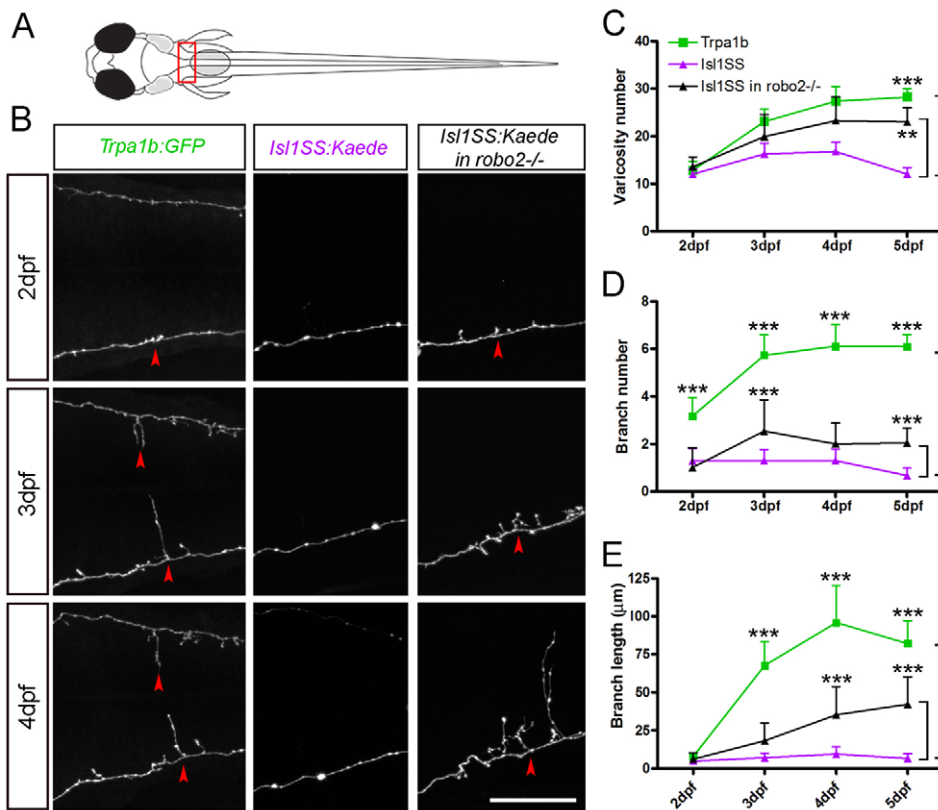

**Fig. 7. Morphogenesis of subtype-specific branch growth and synaptogenesis.** (A) Multi-time point imaging was performed in segments 9–11 (boxed area), where the innervation pattern differs most between *Trpa1b* and *Isl1SS* neurons. (B) Fluorescent images of individual trigeminal sensory neuron afferents imaged from 2 to 4 dpf. Representative examples are shown for *Trpa1b* (left column), *Isl1SS* (middle) and *Isl1SS* in *robo2<sup>-/-</sup>* (right) zebrafish. Red arrowheads point to branches. (C–E) Afferent morphology is compared between genotypes (wild type versus *robo2<sup>-/-</sup>* in the *Isl1SS* subtype) and subtypes (*Trpa1b* versus *Isl1SS*). Error bars indicate s.e.m. \*\*,  $P < 0.01$ ; \*\*\*,  $P < 0.001$ . Scale bar: 50  $\mu\text{m}$ .

branch length. These results reveal that the morphological divergence of trigeminal subtypes depends on selective growth and synaptogenesis rather than selective pruning.

To determine how Robo2 affects axon morphogenesis, we examined the growth of *Isl1SS* axons in *robo2* mutants. Loss of *robo2* did not affect axonal morphogenesis in early development (2 dpf), despite the early expression of *robo2* in wild type (Fig. 7B, right column). As the afferent axons matured, *robo2<sup>-/-</sup>* *Isl1SS* axons began to form more varicosities and branches, whereas their wild-type counterparts remained largely unchanged (Fig. 7C–E). These results reveal that *Isl1SS* axons have an intrinsic capacity for growth that is suppressed by Robo2.

## DISCUSSION

The hindbrain is the first relay and processing station of somatosensory neural circuits. Sensory afferents carrying diverse sensory modalities, such as touch, chemicals and temperature, project to specific regions in the hindbrain and spinal cord. Our study defines a mechanism by which two trigeminal sensory neuron subtypes acquire distinct afferent morphologies and axon projections: subtype-specific expression of Robo2 inhibits branch growth and presynaptic terminal formation (Fig. 8).

### Regulation of axonal morphology in somatosensory subtypes

There is a growing understanding of the molecular and physiological properties of different trigeminal sensory neuron subtypes and their afferent targets (Liu and Ma, 2011; Perl, 2007). However, it has been unclear whether systematic differences exist in the afferent branching patterns and synaptic densities between defined trigeminal sensory neuron subtypes (Hayashi, 1985a; Hayashi, 1985b; Jacquin et al., 1986; Light and Perl, 1979). Our results reveal that subclasses of trigeminal sensory neurons have

overall similar axon trajectories but display very different afferent branching morphologies. Differences in Robo/Slit signaling play a major role in ensuring subtype-specific projections. Most notably, Robo2 acts to dampen synaptogenesis and branch growth but not branch number in the *Isl1SS* subtype.

In the hindbrain, Slit proteins are expressed in the floor plate, rhombic lip and in several hindbrain nuclei (Hammond et al., 2005; Marillat et al., 2002; Yuan et al., 1999). The expression of Slit genes might prevent trigeminal afferents from forming inappropriate contacts with Slit-expressing cells. We found *slit3* expression in the cranial motor nuclei, similar to mammalian *Slit2/3* expression (Geisen et al., 2008). Several cranial motor nuclei (V, VII and XII) are involved in the nociceptive reflex triggered by strong trigeminal stimulation, but they are not directly connected to trigeminal sensory neurons (Dong et al., 2011). Given the close proximity of cranial nuclei and trigeminal afferents, Robo2/Slit3 signaling might be required to prevent erroneous innervations.

In addition to cell type-specific inhibition mediated by Robo2 signaling, growth-promoting signals may also play a role in establishing sensory subcircuits. In the absence of Robo2 inhibition, we found that *Isl1SS* neurons are also able to increase growth and synaptogenesis in the same *Trpa1b* peak segments. This suggests that both subtypes can respond to a putative growth-promoting signal that might be localized to these segments. Previous studies have identified potential candidates for such a signal. For example, expression studies in other model systems suggest that multiple axon guidance pathways are active in trigeminal sensory neurons, including Neurotrophin/Trk, Netrin/Unc5 and Semaphorin/Neuropilin (Erzurumlu et al., 2010; Masuda et al., 2008). Other Robo family members (Robo1 and Robo3) might also play a role (Ma and Tessier-Lavigne, 2007). It is a challenge for the future to identify potential growth-promoting signals and investigate their interactions with the Robo2 pathway.



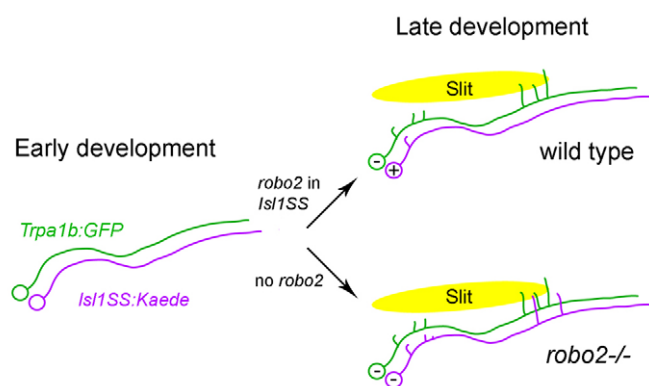

**Fig. 8. Robo2-dependent morphogenesis in trigeminal sensory neurons.** Trigeminal sensory neurons from *Isl1SS* (magenta) and *Trpa1b* (green) subtypes have similar morphology during early development. In wild-type fish, developmental maturation leads to preferential expression of *robo2* in the *Isl1SS* subtype (marked by '+') but not in the *Trpa1b* subtype (marked by '-'). Robo2, which is likely to be activated by secreted Slit proteins in the hindbrain (yellow oval), inhibits branch growth and synaptogenesis specifically in the *Isl1SS* subtype. In *robo2*<sup>-/-</sup> fish, both subtypes lack Robo2. The *Isl1SS* subtype, now relieved of Robo2 inhibition, extends axon branches and forms synapses in the same areas as in the *Trpa1b* subtype.

### Functional implications of subtype-specific projection patterns

Somatosensory afferents innervate selective hindbrain and spinal cord regions in a cell type-specific manner and thereby activate divergent downstream targets to initiate distinct behavioral responses (Braz et al., 2005; Brodal, 2010). We observed two regions, one anterior and one posterior, where *Trpa1b* and *Isl1SS* neurons showed different innervation density (as measured by varicosity number). The anterior region (segments 3–4) corresponds to rhombomeres 5–6, which contain reticulospinal neurons (the Mauthner array neurons) important for the trigeminal-mediated fast escape response in zebrafish (Caron et al., 2008; Douglass et al., 2008; Kohashi and Oda, 2008; Liu and Fetcho, 1999; Sagasti et al., 2005). The observed high (in *Trpa1b*) and low (in *Isl1SS*) innervation density in this region suggests that there might be subtype-specific patterns of Mauthner array activation and initiation of the fast escape response.

The posterior region (segments 9–11) corresponds to the caudalis subnuclei of the SpV, which is known to be crucial for trigeminal sensory neuron-mediated pain (e.g. toothache, headache, migraine) (Sessle, 2000). Selective innervation by nociceptive *Trpa1b* afferents suggests that there might be functional similarity between fish and mammals in this anatomical region. The identities and function of *Trpa1b* target cells are not yet known, but this region has recently been proposed to contain specialized cells that can initiate persistent swimming (Kyriakatos et al., 2011). This would be consistent with the observation that *Trpa1b* activation increases overall motor activity (Prober et al., 2008) and raises the possibility that *Isl1SS* and *Trpa1b* subtypes have distinct abilities to trigger persistent swimming.

### Acknowledgements

We dedicate this study to C. B. Chien and thank him for the *robo2* and Slit gene probes, *robo2* (*astray*) mutant fish and for many thoughtful suggestions. We thank D. Yelon for the CHOR1211–236120 BAC clone; M. Meyer for the Syp:GFP-DSR plasmid; S. Zimmerman, J. Miller and K. Hurley for fish care; P. Huang, F. Imam, J. Kay, F. Merkle and X. Wang for critical comments on the manuscript; and members of the Schier laboratory for discussion.

### Funding

This work was supported by a National Research Service Award (NRSA) postdoctoral fellowship from the National Institutes of Health [F32 NS057870 to Y.A.P.]; and research grants from the National Institutes of Health [R01 HD067140 and R01 NS049319 to A.F.S.]. Deposited in PMC for release after 12 months.

### Competing interests statement

The authors declare no competing financial interests.

### Supplementary material

Supplementary material available online at <http://dev.biologists.org/lookup/suppl/doi:10.1242/dev.076588/-/DC1>

### References

- Ando, R., Hama, H., Yamamoto-Hino, M., Mizuno, H. and Miyawaki, A. (2002). An optical marker based on the UV-induced green-to-red photoconversion of a fluorescent protein. *Proc. Natl. Acad. Sci. USA* **99**, 12651–12656.
- Appelbaum, L., Wang, G., Yokogawa, T., Skariah, G. M., Smith, S. J., Mourrain, P. and Mignot, E. (2010). Circadian and homeostatic regulation of structural synaptic plasticity in hypocretin neurons. *Neuron* **68**, 87–98.
- Basbaum, A. I., Bautista, D. M., Scherrer, G. and Julius, D. (2009). Cellular and molecular mechanisms of pain. *Cell* **139**, 267–284.
- Braz, J. M., Nassar, M. A., Wood, J. N. and Basbaum, A. I. (2005). Parallel 'pain' pathways arise from subpopulations of primary afferent nociceptor. *Neuron* **47**, 787–793.
- Brodal, P. (2010). *The Central Nervous System: Structure and Function*. Oxford: Oxford University Press.
- Campbell, D. S., Stringham, S. A., Timm, A., Xiao, T., Law, M.-Y., Baier, H., Nonet, M. L. and Chien, C.-B. (2007). Slit1a inhibits retinal ganglion cell arborization and synaptogenesis via Robo2-dependent and -independent pathways. *Neuron* **55**, 231–245.
- Caron, S. J., Prober, D., Choy, M. and Schier, A. F. (2008). In vivo birthdating by BAPTISM reveals that trigeminal sensory neuron diversity depends on early neurogenesis. *Development* **135**, 3259–3269.
- Caterina, M. J., Schumacher, M. A., Tominaga, M., Rosen, T. A., Levine, J. D. and Julius, D. (1997). The capsaicin receptor: a heat-activated ion channel in the pain pathway. *Nature* **389**, 816–824.
- Cavanaugh, D. J., Chesler, A. T., Braz, J. M., Shah, N. M., Julius, D. and Basbaum, A. I. (2011). Restriction of transient receptor potential vanilloid-1 to the peptidergic subset of primary afferent neurons follows its developmental downregulation in nonpeptidergic neurons. *J. Neurosci.* **31**, 10119–10127.
- Chen, C. C., Akopian, A. N., Sivilotti, L., Colquhoun, D., Burnstock, G. and Wood, J. N. (1995). A P2X purinoceptor expressed by a subset of sensory neurons. *Nature* **377**, 428–431.
- Cho, J. H., Lepine, M., Andrews, W., Parnavelas, J. and Cloutier, J. F. (2007). Requirement for Slit-1 and Robo-2 in zonal segregation of olfactory sensory neuron axons in the main olfactory bulb. *J. Neurosci.* **27**, 9094–9104.
- Cho, J. H., Prince, J. E., Cutforth, T. and Cloutier, J. F. (2011). The pattern of glomerular map formation defines responsiveness to aversive odors in mice. *J. Neurosci.* **31**, 7920–7926.
- Clarke, W. B. and Bowsher, D. (1962). Terminal distribution of primary afferent trigeminal fibers in the rat. *Exp. Neurol.* **6**, 372–383.
- Dhaka, A., Earley, T. J., Watson, J. and Patapoutian, A. (2008). Visualizing cold spots: TRPM8-expressing sensory neurons and their projections. *J. Neurosci.* **28**, 566–575.
- Dickson, B. J. and Gilestro, G. F. (2006). Regulation of commissural axon pathfinding by slit and its Robo receptors. *Annu. Rev. Cell Dev. Biol.* **22**, 651–675.
- Dong, Y., Li, J., Zhang, F. and Li, Y. (2011). Nociceptive afferents to the premotor neurons that send axons simultaneously to the facial and hypoglossal motoneurons by means of axon collaterals. *PLoS ONE* **6**, e25615.
- Douglass, A. D., Kraves, S., Deisseroth, K., Schier, A. F. and Engert, F. (2008). Escape behavior elicited by single, channelrhodopsin-2-evoked spikes in zebrafish somatosensory neurons. *Curr. Biol.* **18**, 1133–1137.
- Erzurumlu, R. S., Chen, Z.-F. and Jacquin, M. F. (2006). Molecular determinants of the face map development in the trigeminal brainstem. *Anat. Rec. A Discov. Mol. Cell. Evol. Biol.* **288**, 121–134.
- Erzurumlu, R. S., Murakami, Y. and Rijli, F. M. (2010). Mapping the face in the somatosensory brainstem. *Nat. Rev. Neurosci.* **11**, 252–263.
- Fricke, C., Lee, J. S., Geiger-Rudolph, S., Bonhoeffer, F. and Chien, C. B. (2001). *astray*, a zebrafish roundabout homolog required for retinal axon guidance. *Science* **292**, 507–510.
- Geisen, M. J., Di Meglio, T., Pasqualetti, M., Ducret, S., Brunet, J. F., Chedotal, A. and Rijli, F. M. (2008). Hox paralog group 2 genes control the migration of mouse pontine neurons through slit-robo signaling. *PLoS Biol.* **6**, e142.
- Goatsby, P. J. and Hoskin, K. L. (1997). The distribution of trigeminovascular afferents in the nonhuman primate brain *Macaca nemestrina*: a c-fos immunocytochemical study. *J. Anat.* **190**, 367–375.

- Goll, M. G., Anderson, R., Stainier, D. Y., Spradling, A. C. and Halpern, M. E. (2009). Transcriptional silencing and reactivation in transgenic zebrafish. *Genetics* **182**, 747-755.
- Hammond, R., Vivancos, V., Naeem, A., Chilton, J., Mambitisaeva, E., Andrews, W., Sundaresan, V. and Guthrie, S. (2005). Slit-mediated repulsion is a key regulator of motor axon pathfinding in the hindbrain. *Development* **132**, 4483-4495.
- Hayashi, H. (1985a). Morphology of central terminations of intra-axonally stained, large, myelinated primary afferent fibers from facial skin in the rat. *J. Comp. Neurol.* **237**, 195-215.
- Hayashi, H. (1985b). Morphology of terminations of small and large myelinated trigeminal primary afferent fibers in the cat. *J. Comp. Neurol.* **240**, 71-89.
- Higashijima, S., Hotta, Y. and Okamoto, H. (2000). Visualization of cranial motor neurons in live transgenic zebrafish expressing green fluorescent protein under the control of the islet-1 promoter/enhancer. *J. Neurosci.* **20**, 206-218.
- Hutson, L. D. and Chien, C. B. (2002). Pathfinding and error correction by retinal axons: the role of *astray/robo2*. *Neuron* **33**, 205-217.
- Hutson, L. D., Juryneć, M. J., Yeo, S. Y., Okamoto, H. and Chien, C. B. (2003). Two divergent slit1 genes in zebrafish. *Dev. Dyn.* **228**, 358-369.
- Jacquín, M. F., Renehan, W. E., Mooney, R. D. and Rhoades, R. W. (1986). Structure-function relationships in rat medullary and cervical dorsal horns. I. Trigeminal primary afferents. *J. Neurophysiol.* **55**, 1153-1186.
- Kay, J. N., De la Huerta, I., Kim, I. J., Zhang, Y., Yamagata, M., Chu, M. W., Meister, M. and Sanes, J. R. (2011). Retinal ganglion cells with distinct directional preferences differ in molecular identity, structure, and central projections. *J. Neurosci.* **31**, 7753-7762.
- Kim, Y. S., Paik, S. K., Cho, Y. S., Shin, H. S., Bae, J. Y., Moritani, M., Yoshida, A., Ahn, D. K., Valtchanoff, J., Hwang, S. J. et al. (2008). Expression of P2X3 receptor in the trigeminal sensory nuclei of the rat. *J. Comp. Neurol.* **506**, 627-639.
- Kim, Y. S., Son, J. Y., Kim, T. H., Paik, S. K., Dai, Y., Noguchi, K., Ahn, D. K. and Bae, Y. C. (2010). Expression of transient receptor potential ankyrin 1 (TRPA1) in the rat trigeminal sensory afferents and spinal dorsal horn. *J. Comp. Neurol.* **518**, 687-698.
- Kimmel, C. B., Ballard, W. W., Kimmel, S. R., Ullmann, B. and Schilling, T. F. (1995). Stages of embryonic development of the zebrafish. *Dev. Dyn.* **203**, 253-310.
- Knaut, H., Blader, P., Strähle, U. and Schier, A. F. (2005). Assembly of trigeminal sensory ganglia by chemokine signaling. *Neuron* **47**, 653-666.
- Kohashi, T. and Oda, Y. (2008). Initiation of Mauthner- or non-Mauthner-mediated fast escape evoked by different modes of sensory input. *J. Neurosci.* **28**, 10641-10653.
- Kucenas, S., Soto, F., Cox, J. A. and Voigt, M. M. (2006). Selective labeling of central and peripheral sensory neurons in the developing zebrafish using P2X(3) receptor subunit transgenes. *Neuroscience* **138**, 641-652.
- Kyriakatos, A., Mahmood, R., Ausborn, J., Porres, C. P., Buschges, A. and El Manira, A. (2011). Initiation of locomotion in adult zebrafish. *J. Neurosci.* **31**, 8422-8431.
- Lee, J. S., Ray, R. and Chien, C. B. (2001). Cloning and expression of three zebrafish roundabout homologs suggest roles in axon guidance and cell migration. *Dev. Dyn.* **221**, 216-230.
- Light, A. R. and Perl, E. R. (1979). Spinal termination of functionally identified primary afferent neurons with slowly conducting myelinated fibers. *J. Comp. Neurol.* **186**, 133-150.
- Liu, K. S. and Fetcho, J. R. (1999). Laser ablations reveal functional relationships of segmental hindbrain neurons in zebrafish. *Neuron* **23**, 325-335.
- Liu, Y. and Ma, Q. (2011). Generation of somatic sensory neuron diversity and implications on sensory coding. *Curr. Opin. Neurobiol.* **21**, 52-60.
- Luo, L. and Flanagan, J. G. (2007). Development of continuous and discrete neural maps. *Neuron* **56**, 284-300.
- Ma, L. and Tessier-Lavigne, M. (2007). Dual branch-promoting and branch-repelling actions of Slit/Robo signaling on peripheral and central branches of developing sensory axons. *J. Neurosci.* **27**, 6843-6851.
- Ma, L. H., Punnamoottil, B., Rinkwitz, S. and Baker, R. (2009). Mosaic *hoxb4a* neuronal pleiotropism in zebrafish caudal hindbrain. *PLoS ONE* **4**, e5944.
- Mapp, O. M., Walsh, G. S., Moens, C. B., Tada, M. and Prince, V. E. (2011). Zebrafish Prickle1b mediates facial branchiomotor neuron migration via a farnesylation-dependent nuclear activity. *Development* **138**, 2121-2132.
- Marillat, V., Cases, O., Nguyen-Ba-Charvet, K. T., Tessier-Lavigne, M., Sotelo, C. and Chedotal, A. (2002). Spatiotemporal expression patterns of slit and robo genes in the rat brain. *J. Comp. Neurol.* **442**, 130-155.
- Marmigere, F. and Ernfors, P. (2007). Specification and connectivity of neuronal subtypes in the sensory lineage. *Nat. Rev. Neurosci.* **8**, 114-127.
- Martin, S. C., Marazzi, G., Sandell, J. H. and Heinrich, G. (1995). Five Trk receptors in the zebrafish. *Dev. Biol.* **169**, 745-758.
- Martin, S. C., Sandell, J. H. and Heinrich, G. (1998). Zebrafish TrkC1 and TrkC2 receptors define two different cell populations in the nervous system during the period of axonogenesis. *Dev. Biol.* **195**, 114-130.
- Masland, R. H. (2004). Neuronal cell types. *Curr. Biol.* **14**, R497-R500.
- Masuda, T., Watanabe, K., Sakuma, C., Ikenaka, K., Ono, K. and Yaginuma, H. (2008). Netrin-1 acts as a repulsive guidance cue for sensory axonal projections toward the spinal cord. *J. Neurosci.* **28**, 10380-10385.
- Meyer, M. P. and Smith, S. J. (2006). Evidence from in vivo imaging that synaptogenesis guides the growth and branching of axonal arbors by two distinct mechanisms. *J. Neurosci.* **26**, 3604-3614.
- Mombaerts, P., Wang, F., Dulac, C., Chao, S. K., Nemes, A., Mendelsohn, M., Edmondson, J. and Axel, R. (1996). Visualizing an olfactory sensory map. *Cell* **87**, 675-686.
- Nash, P. G., Macefield, V. G., Klineberg, I. J., Murray, G. M. and Henderson, L. A. (2009). Differential activation of the human trigeminal nuclear complex by noxious and non-noxious orofacial stimulation. *Hum. Brain Mapp.* **30**, 3772-3782.
- Noma, N., Tsuboi, Y., Kondo, M., Matsumoto, M., Sessle, B. J., Kitagawa, J., Saito, K. and Iwata, K. (2008). Organization of pERK-immunoreactive cells in trigeminal spinal nucleus caudalis and upper cervical cord following capsaicin injection into oral and craniofacial regions in rats. *J. Comp. Neurol.* **507**, 1428-1440.
- Ozdinler, P. H. and Erzurumlu, R. S. (2002). Slit2, a branching-arborization factor for sensory axons in the mammalian CNS. *J. Neurosci.* **22**, 4540-4549.
- Perl, E. R. (2007). Ideas about pain, a historical view. *Nat. Rev. Neurosci.* **8**, 71.
- Prober, D. A., Zimmerman, S., Myers, B. R., McDermott, B. M., Kim, S.-H., Caron, S., Rihel, J., Solnica-Krezel, L., Julius, D., Hudspeth, A. J. et al. (2008). Zebrafish TRPA1 channels are required for chemosensation but not for thermosensation or mechanosensory hair cell function. *J. Neurosci.* **28**, 10102-10110.
- Sagasti, A., Guido, M. R., Raible, D. W. and Schier, A. F. (2005). Repulsive interactions shape the morphologies and functional arrangement of zebrafish peripheral sensory arbors. *Curr. Biol.* **15**, 804-814.
- Schoenebeck, J. J., Keegan, B. R. and Yelon, D. (2007). Vessel and blood specification override cardiac potential in anterior mesoderm. *Dev. Cell* **13**, 254-267.
- Sessle, B. J. (2000). Acute and chronic craniofacial pain: brainstem mechanisms of nociceptive transmission and neuroplasticity, and their clinical correlates. *Crit. Rev. Oral Biol. Med.* **11**, 57-91.
- Story, G. M., Peier, A. M., Reeve, A. J., Eid, S. R., Mosbacher, J., Hricik, T. R., Earley, T. J., Hergarden, A. C., Andersson, D. A., Hwang, S. W. et al. (2003). ANKTM1, a TRP-like channel expressed in nociceptive neurons, is activated by cold temperatures. *Cell* **112**, 819-829.
- Sugimoto, T., Fujiyoshi, Y., He, Y. F., Xiao, C. and Ichikawa, H. (1997a). Trigeminal primary projection to the rat brain stem sensory trigeminal nuclear complex and surrounding structures revealed by anterograde transport of cholera toxin B subunit-conjugated and Bandeiraea simplicifolia isolectin B4-conjugated horseradish peroxidase. *Neurosci. Res.* **28**, 361-371.
- Sugimoto, T., Fujiyoshi, Y., Xiao, C., He, Y. F. and Ichikawa, H. (1997b). Central projection of calcitonin gene-related peptide (CGRP)- and substance P (SP)-immunoreactive trigeminal primary neurons in the rat. *J. Comp. Neurol.* **378**, 425-442.
- Takashima, Y., Daniels, R. L., Knowlton, W., Teng, J., Liman, E. R. and McKemy, D. D. (2007). Diversity in the neural circuitry of cold sensing revealed by genetic axonal labeling of transient receptor potential melastatin 8 neurons. *J. Neurosci.* **27**, 14147-14157.
- Thermes, V., Grabher, C., Ristatore, F., Bourrat, F., Choulika, A., Wittbrodt, J. and Joly, J. S. (2002). I-SceI meganuclease mediates highly efficient transgenesis in fish. *Mech. Dev.* **118**, 91-98.
- Todd, A. J. (2010). Neuronal circuitry for pain processing in the dorsal horn. *Nat. Rev. Neurosci.* **11**, 823-836.
- Williams, J. A., Barrios, A., Gatchalian, C., Rubin, L., Wilson, S. W. and Holder, N. (2000). Programmed cell death in zebrafish Rohon-Beard neurons is influenced by TrkC1/NT-3 signaling. *Dev. Biol.* **226**, 220-230.
- Woolf, C. J. and Ma, Q. (2007). Nociceptors-noxious stimulus detectors. *Neuron* **55**, 353-364.
- Xiao, T., Staub, W., Robles, E., Gosse, N. J., Cole, G. J. and Baier, H. (2011). Assembly of lamina-specific neuronal connections by slit bound to type IV collagen. *Cell* **146**, 164-176.
- Yeo, S. Y., Miyashita, T., Fricke, C., Little, M. H., Yamada, T., Kuwada, J. Y., Huh, T. L., Chien, C. B. and Okamoto, H. (2004). Involvement of Islet-2 in the Slit signaling for axonal branching and defasciculation of the sensory neurons in embryonic zebrafish. *Mech. Dev.* **121**, 315-324.
- Ypsilanti, A. R., Zagar, Y. and Chedotal, A. (2010). Moving away from the midline: new developments for Slit and Robo. *Development* **137**, 1939-1952.
- Yuan, W., Zhou, L., Chen, J. H., Wu, J. Y., Rao, Y. and Ornitz, D. M. (1999). The mouse SLIT family: secreted ligands for ROBO expressed in patterns that suggest a role in morphogenesis and axon guidance. *Dev. Biol.* **212**, 290-306.
- Zhang, Y., Buchholz, F., Muysers, J. P. and Stewart, A. F. (1998). A new logic for DNA engineering using recombination in Escherichia coli. *Nat. Genet.* **20**, 123-128.
- Zylka, M. J., Rice, F. L. and Anderson, D. J. (2005). Topographically distinct epidermal nociceptive circuits revealed by axonal tracers targeted to Mrgprd. *Neuron* **45**, 17-25.
